# Supplementary material for: A novel topological centrality measure capturing biologically important proteins
Source: Royal Society of Chemistry journal article supplement (doi:10.1039/c5mb00732a), 2015-12-08
Supplement: c5mb00732a1.pdf [file c5mb00732a1.pdf]

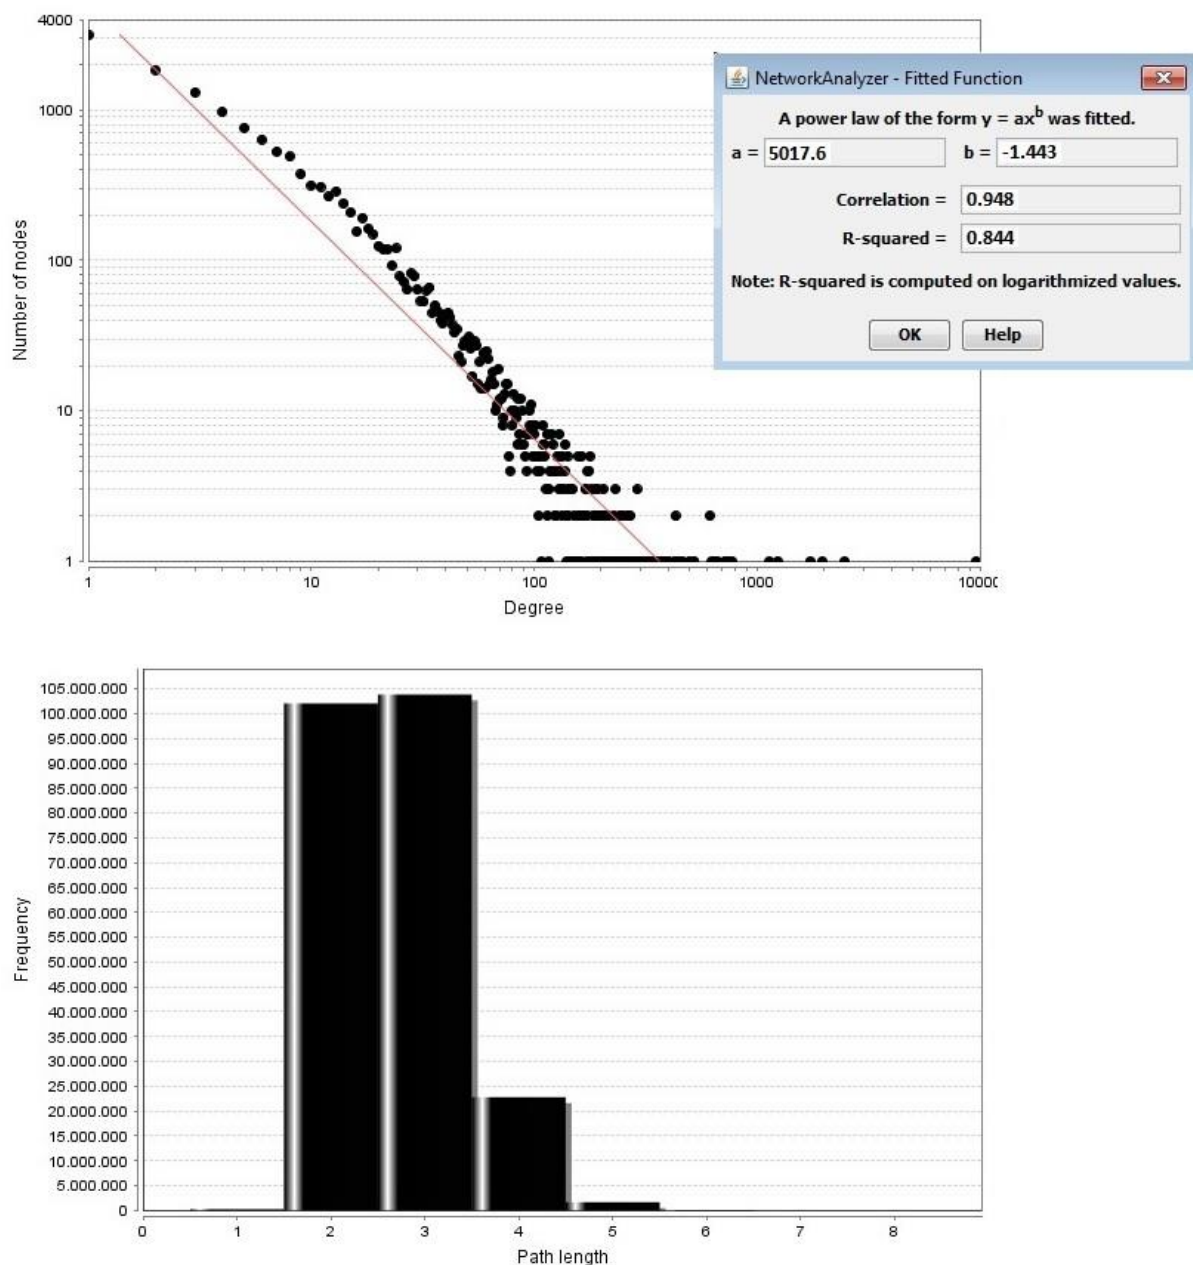

**Fig. S.1.** Degree distribution (top) and shortest path length distribution (bottom) of H network. Power law parameters fit to the degree distribution were shown at the window.

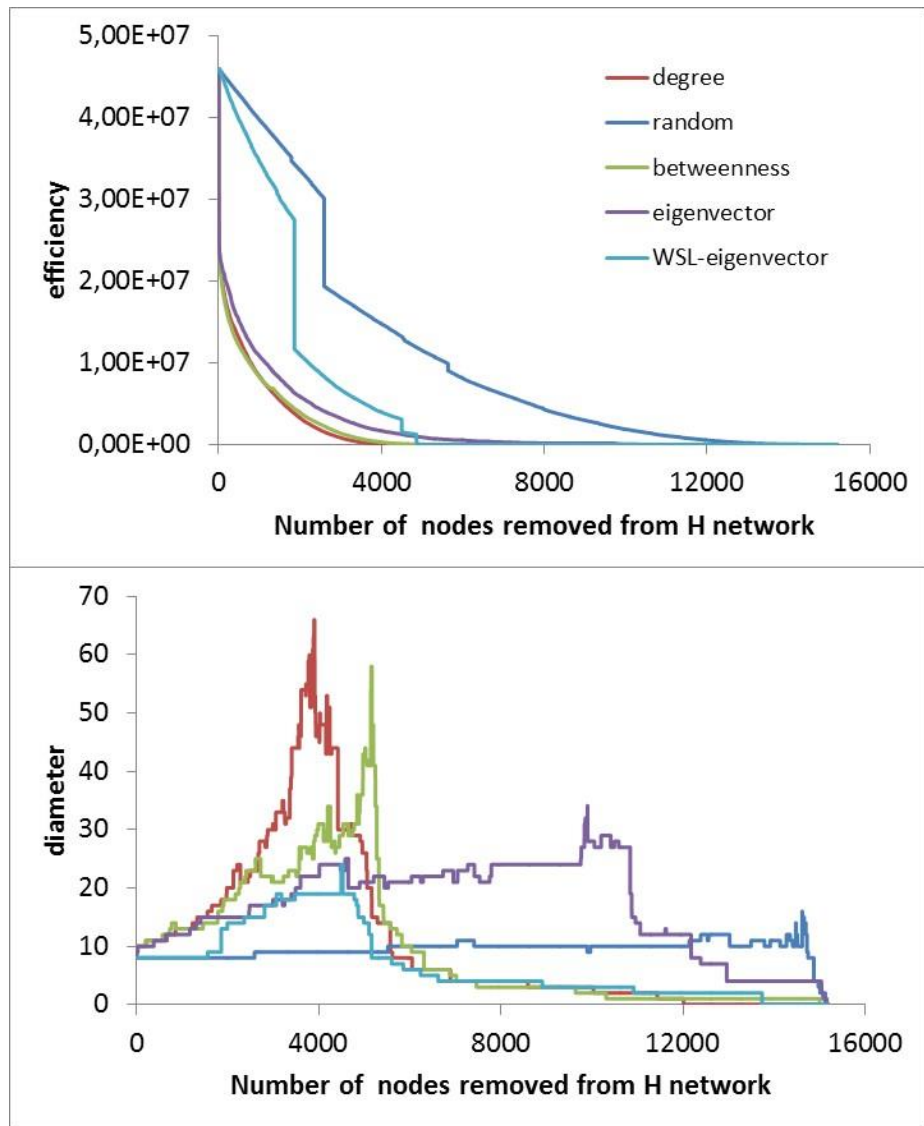

**Fig. S.2.** Change in efficiency and diameter by random and targeted node removals from H network.

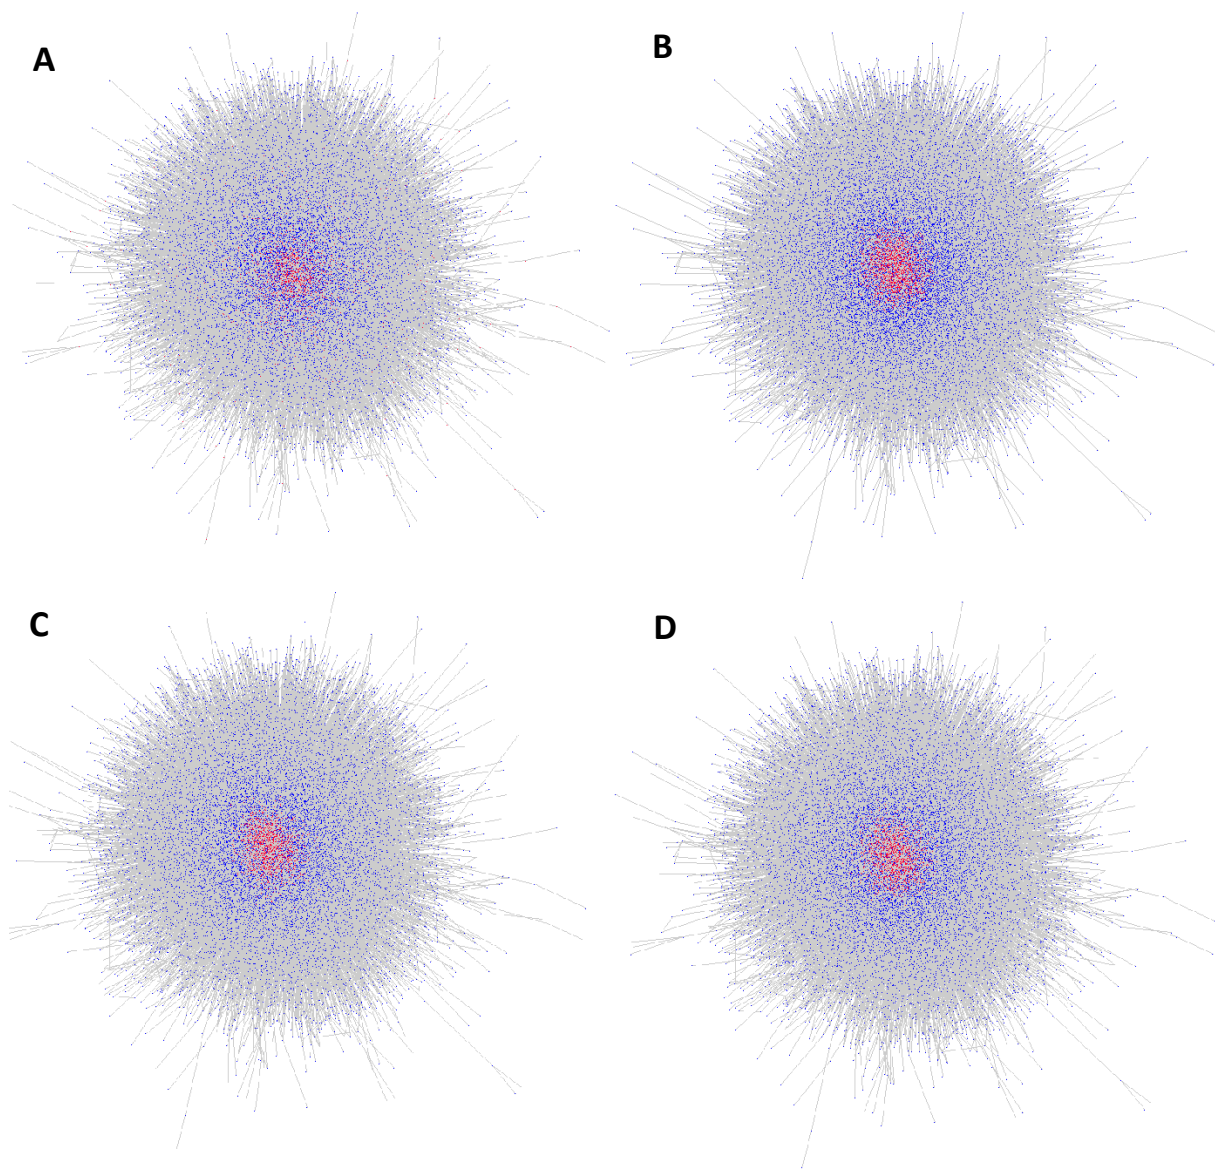

**Fig. S.3.** Red nodes are hubs defined by (A) BC, (B) EC, (C) DC, (D) WSL-EC in H network.
