# Supplementary material for: A novel topological centrality measure capturing biologically important proteins
Source: Royal Society of Chemistry journal article supplement (doi:10.1039/c5mb00732a), 2015-12-08
Supplement: c5mb00732a3.xlsx [file c5mb00732a3.xlsx]

## Sheet: Table S.1.
Table S.1. Top 10 Highest Scoring WSL-EC hubs and Significantly Associated Pathways
	Description	Pathways
RIOK2	Serine/Threonine-Protein Kinase RIO2	Ribosome biogenesis in eukaryotes
VCAM1	Vascular Cell Adhesion Molecule 1	NF-kappa B signaling pathway Cell adhesion molecules (CAMs) TNF signaling pathway Leukocyte transendothelial migration African trypanosomiasis Malaria HTLV-I infection
ITGA4	Integrin, Alpha 4 (Antigen CD49D, Alpha 4 Subunit Of VLA-4 Receptor)	PI3K-Akt signaling pathway Focal adhesion ECM-receptor interaction Cell adhesion molecules (CAMs) Hematopoietic cell lineage Leukocyte transendothelial migration Intestinal immune network for IgA production Regulation of actin cytoskeleton Leishmaniasis Hypertrophic cardiomyopathy (HCM) Arrhythmogenic right ventricular cardiomyopathy (ARVC) Dilated cardiomyopathy
HSPA8	Heat Shock 70kDa Protein 8	Spliceosome MAPK signaling pathway Protein processing in endoplasmic reticulum Endocytosis Antigen processing and presentation Estrogen signaling pathway Legionellosis Toxoplasmosis Measles Influenza A Epstein-Barr virus infection
HSPA5	Heat Shock 70kDa Protein 5 (Glucose-Regulated Protein, 78kDa)	Protein export Protein processing in endoplasmic reticulum Antigen processing and presentation Thyroid hormone synthesis Prion diseases
PHKG2	Phosphorylase Kinase Subunit Gamma-2	Calcium signaling pathway Insulin signaling pathway Glucagon signaling pathway
CSNK1A1	Casein Kinase 1, Alpha 1	Wnt signaling pathway Hedgehog signaling pathway
CSNK1E	Casein Kinase 1, Epsilon	FoxO signaling pathway Wnt signaling pathway Hedgehog signaling pathway Hippo signaling pathway Circadian rhythm
HNRNPK	Heterogeneous Nuclear Ribonucleoprotein K	Spliceosome Herpes simplex infection Viral carcinogenesis MicroRNAs in cancer
CUL4B	Cullin 4B	Nucleotide excision repair Ubiquitin mediated proteolysis

## Sheet: Table S.2.
Table S.2. Top 10 Highest Scoring DC Hubs and and Significantly Associated Pathways
	Description	Pathways
UBC	Ubiquitin C	PPAR signaling pathway
NRF1	Nuclear Respiratory Factor 1	Huntington's disease
APP	Amyloid Beta (A4) Precursor Protein	Serotonergic synapse Alzheimer's disease
ELAVL1	ELAV (Embryonic Lethal, Abnormal Vision, Drosophila) Like RNA Binding Protein 1	AMPK signaling pathway
SUMO2	Small Ubiquitin-Like Modifier 2	RNA transport
CUL3	Cullin 3	Ubiquitin mediated proteolysis
COPS5	COP9 Signalosome Subunit 5	-
SUMO1	Small Ubiquitin-Like Modifier 1	RNA transport
HSP90AA1	Heat Shock Protein 90kDa Alpha (Cytosolic), Class A Member 1	Protein processing in endoplasmic reticulum PI3K-Akt signaling pathway Antigen processing and presentation NOD-like receptor signaling pathway Progesterone-mediated oocyte maturation Estrogen signaling pathway Pathways in cancer Prostate cancer
FN1	Fibronectin 1	PI3K-Akt signaling pathway Focal adhesion ECM-receptor interaction Regulation of actin cytoskeleton Bacterial invasion of epithelial cells Amoebiasis Pathways in cancer Proteoglycans in cancer Small cell lung cancer

## Sheet: Table S.3.
Table S.3. Top 10 Highest Scoring BC Hubs and Significantly Associated Pathways
	Description	Pathways
UBC	Ubiquitin C	PPAR signaling pathway
NRF1	Nuclear Respiratory Factor 1	Huntington's disease
APP	Amyloid Beta (A4) Precursor Protein	Serotonergic synapse Alzheimer's disease
ELAVL1	ELAV (Embryonic Lethal, Abnormal Vision, Drosophila) Like RNA Binding Protein 1	AMPK signaling pathway
HSP90AA1	Heat Shock Protein 90kDa Alpha (Cytosolic), Class A Member 1	Protein processing in endoplasmic reticulum PI3K-Akt signaling pathway Antigen processing and presentation NOD-like receptor signaling pathway Progesterone-mediated oocyte maturation Estrogen signaling pathway Pathways in cancer Prostate cancer
SUMO2	Small Ubiquitin-Like Modifier 2	RNA transport
CUL3	Cullin 3	Ubiquitin mediated proteolysis
SUMO1	Small Ubiquitin-Like Modifier 1	RNA transport
FBXO6	F-Box Protein 6	Protein processing in endoplasmic reticulum
BAG3	BCL2-Associated Athanogene 3	-

## Sheet: Table S.4.
Table S.4. Top 10 Highest Scoring EC Hubs and Significantly Associated Pathways
	Description	Pathways
UBC	Ubiquitin C	PPAR signaling pathway
NRF1	Nuclear Respiratory Factor 1	Huntington's disease
CUL3	Cullin 3	Ubiquitin mediated proteolysis
SUMO2	Small Ubiquitin-Like Modifier 2	RNA transport
ELAVL1	ELAV (Embryonic Lethal, Abnormal Vision, Drosophila) Like RNA Binding Protein 1	AMPK signaling pathway
APP	Amyloid Beta (A4) Precursor Protein	Serotonergic synapse Alzheimer's disease
COPS5	COP9 Signalosome Subunit 5	-
FN1	Fibronectin 1	PI3K-Akt signaling pathway Focal adhesion ECM-receptor interaction Regulation of actin cytoskeleton Bacterial invasion of epithelial cells Amoebiasis Pathways in cancer Proteoglycans in cancer Small cell lung cancer
CAND1	Cullin-Associated And Neddylation-Dissociated 1	-
CUL1	Cullin 1	Cell cycle Oocyte meiosis Ubiquitin mediated proteolysis Protein processing in endoplasmic reticulum Wnt signaling pathway TGF-beta signaling pathway Circadian rhythm Herpes simplex infection
